# Supplementary material
Source: PubMed Central journal article supplement (PMC7844690)
Supplement: jamaotolaryngolheadnecksurg-e204517-s001.pdf [file jamaotolaryngolheadnecksurg-e204517-s001.pdf]

## Supplementary Online Content

Lowery AS, Malenke JA, Bolduan AJ, Shinn J, Wootten CT, Gelbard A. Early intervention for the treatment of acute laryngeal injury after intubation. *JAMA Otolaryngol Head Neck Surg*. Published online January 28, 2021.

doi:10.1001/jamaoto.2020.4517

**eTable.** Grading Assessment of Injury Severity in Patients With Acute Injury

This supplementary material has been provided by the authors to give readers additional information about their work.

**eTable.** Grading Assessment of Injury Severity in Patients With Acute Injury

**Findings:** Initial findings on fiberoptic laryngoscopy at bedside.

**Symptoms:** Patient reported symptoms prompting Otolaryngology consultation.

**Severity:** degree of mucosa disruption overlying medial aspect of cricoarytenoid joints determined at the time of operative direct laryngoscopy.

- *Mild:* superficial mucosal injury,
- *Moderate:* deep tissue injury,
- *Severe:* deep tissue injury with cartilage exposure.

*Severity grading assessment based on: Posterior glottic stenosis: A canine model. Courey M., Grandy LB, Ossoff RH. The Annals of Otolaryngology, Rhinology & Laryngology; Oct 1998; 107, 10*

| Patient # | Age | Sex | Findings | Symptoms | Severity |
|-----------|-----|-----|----------|----------|----------|
| 1         | 62  | F   | BVFMI    | Stridor  | Severe   |
| 2         | 64  | f   | UVFMI    | Stridor  | Moderate |
| 3         | 31  | F   | BVFMI    | Stridor  | Severe   |
| 4         | 71  | F   | BVFMI    | Stridor  | Moderate |
| 5         | 72  | F   | BVFMI    | Stridor  | Severe   |
| 6         | 36  | M   | BVFMI    | Stridor  | Severe   |
| 7         | 43  | M   | BVFMI    | Stridor  | Moderate |
| 8         | 45  | M   | BVFMI    | Stridor  | Moderate |
| 9         | 62  | F   | BVFMI    | Stridor  | Severe   |
| 10        | 31  | F   | BVFMI    | Stridor  | Moderate |
